# Screening for Coding Variants in *FTO* and *SH2B1* Genes in Chinese Patients with Obesity

Zhaojing Zheng<sup>1</sup>\*, Li Hong<sup>2</sup>\*, Xiaodong Huang<sup>3</sup>, Peirong Yang<sup>3</sup>, Juan Li<sup>3</sup>, Yu Ding<sup>3</sup>, Ru-en Yao<sup>1</sup>, Juan Geng<sup>1</sup>, Yongnian Shen<sup>3</sup>, Yiping Shen<sup>1,4</sup>, Qihua Fu<sup>1\*</sup>, Yongguo Yu<sup>3\*</sup>

**1** Department of Laboratory Medicine, Shanghai Children's Medical Center, Shanghai Jiaotong University School of Medicine, Shanghai, P.R. China, **2** Department of Nutrition, Shanghai Children's Medical Center, Shanghai Jiaotong University School of Medicine, Shanghai, P.R. China, **3** Department of Internal Medicine, Shanghai Children's Medical Center, Shanghai Jiaotong University School of Medicine, Shanghai, P.R. China, **4** Department of Laboratory Medicine, Children's Hospital Boston, Boston, Massachusetts, United States of America

## Abstract

**Objective:** To investigate potential functional variants in *FTO* and *SH2B1* genes among Chinese children with obesity.

**Methods:** Sanger sequencing of PCR products of all *FTO* and *SH2B1* exons and their flanking regions were performed in 338 Chinese Han children with obesity and 221 age- and sex-matched lean controls.

**Results:** A total of seven and five rare non-synonymous variants were identified in *FTO* and *SH2B1*, respectively. The overall frequencies of *FTO* and *SH2B1* rare non-synonymous variants were similar in obese and lean children (2.37% and 0.90% vs. 1.81% and 1.36%,  $P > 0.05$ ). However, four out of the seven variants in *FTO* were novel and all were unique to obese children ( $p > 0.05$ ). None of the novel variants was consistently being predicted to be deleterious. Four out of five variants in *SH2B1* were novel and one was unique to obese children ( $p > 0.05$ ). One variant (L293R) that was consistently being predicted as deleterious in *SH2B1* gene was unique to lean control. While rare missense mutations were more frequently detected in girls from obesity as well as lean control than boys, the difference was not statistically significant. In addition, it's shown that the prevalence of rare missense mutations of *FTO* as well as *SH2B1* was similar across different ethnic groups.

**Conclusion:** The rare missense mutations of *FTO* and *SH2B1* did not confer risks of obesity in Chinese Han children in our cohort.

**Citation:** Zheng Z, Hong L, Huang X, Yang P, Li J, et al. (2013) Screening for Coding Variants in *FTO* and *SH2B1* Genes in Chinese Patients with Obesity. *PLoS ONE* 8(6): e67039. doi:10.1371/journal.pone.0067039

**Editor:** Pal Bela Szecsi, Gentofte University Hospital, Denmark

**Received:** January 26, 2013; **Accepted:** May 14, 2013; **Published:** June 25, 2013

**Copyright:** © 2013 Zheng et al. This is an open-access article distributed under the terms of the Creative Commons Attribution License, which permits unrestricted use, distribution, and reproduction in any medium, provided the original author and source are credited.

**Funding:** This work was supported by Project HOPE "The Abbott Fund Institute of Nutrition Science (AFINS-HOPE-2013-05, to YGY)", the other is Shanghai Jiaotong University Cross Biomedical Engineering (YG-2011-MS28, to YGY). This study is further supported by grant from the National Natural Science Foundation of China (No.81000346, to YGY), and grant from Shanghai Science & Technology Commission Major Project (No. 11dz1950300, to YGY). The funders had no role in study design, data collection and analysis, decision to publish, or preparation of the manuscript.

**Competing Interests:** The authors have declared that no competing interests exist.

\* E-mail: qfu@shsmu.edu.cn (QHF); yuyongguo@shsmu.edu.cn (YGY)

† These authors contributed equally to this work.

## Introduction

Obesity is a major public health problem leading to increased mortality and morbidity [1], and obesity in childhood is strongly associated with increased incidence of premature death [2,3]. The prevalence of overweight and obesity in children has been increasing in the world [6], as well as in Asia [4,5]. In Beijing and Shanghai, the prevalence of obesity increased by more than 3-fold from 1985 to 2000, up to 27% in boys and 16% in girls [7]. The increasing prevalence of obesity is contributed by the excessive calorie intake and diminished physical activity in the modern environment. However, considerable evidence from familial segregation and twin studies suggest a significant genetic contribution to adiposity [8,9]. Genetic factors are believed to modulate the impact of the affluent environment on each individual.

Genome-wide association studies (GWAS) have revealed that the single nucleotide polymorphisms (SNPs) in the first intron of fat

mass- and obesity-associated gene (*FTO*) are significantly associated with BMI and increased risk for obesity [10,11] and it is the strongest adiposity locus identified so far [12,13].

SNPs in human SH2B adapter protein 1 gene (*SH2B1*) are also been shown to be associated with leptin resistance and obesity [14–17]. In addition, chromosomal deletions that eliminate the *SH2B1* gene are also associated with severe obesity and insulin resistance in human [18,19]. Genetic deletion of *SH2B1* results in severe leptin resistance, insulin resistance, obesity, and type 2 diabetes in mice [20,21], and neuron-specific restoration of *SH2B1* reverses the obesity and type 2 diabetes phenotypes in *SH2B1* null mice [22]. Collectively, these findings strongly suggest that the *SH2B1* gene has a conserved role in the control of both body weight and metabolism homeostasis in rodents and humans.

In an effort to identifying potential functional variants in *FTO* gene, Meyre, et al [23] sequenced the coding regions of the gene in 1433 severe obese and 1433 lean Caucasian individuals. As a result, almost an equal number of non-synonymous variants were

detected in obese and lean individuals, with more unique variants to the lean. Enzymatic activity analysis further suggested that loss-of-function variants are compatible with lean and did not impose increased risk for obesity. By deep resequencing using next generation sequencing (NGS) technology in 524 severely obese and 527 lean Swedish children, Almén et al, showed little evidence of functional variants in coding region of the *FTO* gene. They concluded that the first intron is the only region within the *FTO* gene associated with obesity [24]. Similarly, Bochukova et al. sequenced the *SH2B1* gene in 500 Caucasian patients from the Genetics of Obesity Study (GOOS) but did not identify any coding or splice site mutations [18]. Since all previous studies were undertaken mainly in Caucasian population, we aim to investigate the prevalence of rare missense mutations of *FTO* and *SH2B1* in Chinese children with early-onset obesity.

## Materials and Methods

### Ethics Statement

The study was approved by the Ethics Committee of Shanghai Children's Medical Center, Shanghai Jiao Tong University School of Medicine. Informed written consents were obtained from all children's parents or guardians before blood sampling and DNA analyses.

### Subjects

Three hundred and thirty-eight Chinese children with BMI >97th percentile were included in this study. A total of 221 lean children with <50th percentile adjusted for sex and age were selected as control from Shanghai Children's Sleep Project [25]. All study subjects were Han Chinese, and the anthropological characteristics of obese and lean children were summarized in Table 1.

### Sanger Sequencing

We screened the exonic and flanking regions of the *FTO* and *SH2B1* by Sanger sequencing. PCR primers (Table S1 & S2) were designed with Primer3 tool (<http://frodo.wi.mit.edu/primer3/>) to contain exonic sequences and their flanking regions of 20 bp. PCR amplifications were inspected for single band of expected sizes on agarose gels before purification with Agencourt AMPure on Biomek NX (Beckman Coulter, USA). Sequencing was achieved using the automated ABI Prism 3730xlDNA Sequencer in combination with the Big Dye Terminator Cycle Sequencing Ready Reaction Kit 3.1 (Applied Biosystems, USA), and purification of sequencing reaction was performed with Agencourt CleanSEQ on Biomek NX (Beckman Coulter, USA). Sequences were assembled and analyzed with MutationSurveyor software (SoftGenetics, USA).

**Table 1.** The anthropological characteristics of children with early-onset obesity and lean control.

|                | Obesity      | Control     | p value |
|----------------|--------------|-------------|---------|
| N (boys/girls) | 338(202/136) | 221(127/94) | >0.05   |
| Age            | 9.62±2.75    | 9.97±2.67   | >0.05   |
| BMI Z-score    | 3.38±1.45    | -0.41±0.42  | <0.01   |

Data are means±SD unless otherwise indicated.  
doi:10.1371/journal.pone.0067039.t001

## Assessment of Functional Impacts of Non-synonymous Mutations

We assessed the functional impacts of *FTO* and *SH2B1* non-synonymous mutations by three software, i.e., Protein Variation Effect Analyzer (PROVEAN), Sorts Intolerant From Tolerant (SIFT) and Polymorphism Phenotyping v2 (Polyphen-2). The PROVEAN cutoff value for deleterious was set at -2.5 as instructed [26]. A default setup was used for SIFT and Polyphen-2 functional prediction.

### Statistics

The prevalence of *FTO* and *SH2B1* rare missense mutations between obese and lean subjects and between our cohort and literature data or public database were compared with Fisher's exact test or Chi-square test. Student's *t*-test and Mann-Whitney test were used to compare the means of age and BMI Z-score between obese and lean children, respectively. Statistics analysis was performed with SPSS17.0 software. A *P* value of <0.05 was considered significant throughout this study.

## Results

### Prevalence of *FTO* Non-synonymous Mutations

A total of seven rare (frequency <1% in the present cohort) non-synonymous variants *FTO* were identified in obese and lean children (Table 2). Among them, 4 of the 7 rare missense mutations were novel (not previously reported in 1000 genome, NHLBI GO Exome Sequencing Project (ESP), and the Human Gene Mutation Database (HGMD)). The prevalence of rare non-synonymous mutations in obese children was similar to that in lean control (2.37% vs. 1.81%, *P*>0.05).

We found that a subset of the rare non-synonymous mutations was unique to each group. Five (L91P, E129K, Y185C, H290R, S482L) variants were identified uniquely in the obese children, whereas only one (D348N) were identified uniquely in the lean control. D144N was present in both obese and lean children. All rare missense mutations were identified in heterozygous pattern. Thus, there was no obvious enrichment of non-synonymous mutations in lean or obese individuals.

Interestingly, we observed a higher frequency of *FTO* rare non-synonymous mutations in girls of obesity as well as of lean control

**Table 2.** Prevalence of rare non-synonymous mutations in *FTO* in obese and lean children.

| Variants                        | Obesity (n = 338) | Control (n = 221) |
|---------------------------------|-------------------|-------------------|
| L91P                            | 1                 | 0                 |
| E129K                           | 1                 | 0                 |
| D144N                           | 3                 | 2                 |
| Y185C                           | 1                 | 0                 |
| H290R                           | 1                 | 0                 |
| D348N                           | 0                 | 2                 |
| S482L                           | 1                 | 0                 |
| Prevalence of mutation carriers | 2.37%             | 1.81%             |
| <i>P</i> value                  | >0.05             |                   |

Rare non-synonymous mutations denote variations with frequency<0.01.  
doi:10.1371/journal.pone.0067039.t002

**Table 3.** Difference on prevalence of *FTO* rare non-synonymous mutation between boys and girls with obesity.

|         | Boys         | Girls        | <i>P</i> value |
|---------|--------------|--------------|----------------|
| Obesity | 1.48%(3/202) | 3.68%(5/136) | >0.05          |
| Control | 0.79%(1/127) | 3.19%(3/94)  | >0.05          |

doi:10.1371/journal.pone.0067039.t003

in our cohort. However, the difference didn't reach a statistical significance (Table 3).

### Prevalence of *SH2B1* Non-synonymous Mutations

A total of 5 rare non-synonymous variants were identified in *SH2B1* in this cohort (Table 4). The prevalence of rare missense mutations in obese and lean children were 0.90% and 1.36%, respectively ( $P>0.05$ ). Two (V209I and M465T) non-synonymous mutations were identified uniquely in obese children, whereas 3 (G131S, L293R, and W649G) were identified uniquely in lean control. One rare mutation, M465T, was identified in two obese children. All mutations were present in heterozygous pattern, and no nonsense variants were reported in the studied populations.

### Prevalence of *FTO* and *SH2B1* Rare Non-synonymous Mutations in Multiple Ethnicities

To explore the possible difference on the prevalence of *FTO* and *SH2B1* rare non-synonymous mutations in different ethnicities, we compared our results with Meyre's [23] data of French and English children with obesity and coding variants data from Exome Variant Server, NHLBI GO Exome Sequencing Project (ESP), Seattle, WA (URL: <http://evs.gs.washington.edu/EVS/>). The results showed that the prevalence of rare non-synonymous mutations of *FTO* in Chinese obese children (2.37%, 8/338) was comparable to the results of Meyer's study [23] (1.32%, 9/680), European American (2.23%, 96/4300), and African American (1.64%, 36/2198) from ESP. Similarly, the prevalence of *SH2B1* rare missense mutations didn't differ significantly between Chinese obese children (0.90%, 3/334) and European American (1.79%, 77/4300) as well as African American (2.50%, 55/2197) from ESP, though there's a marginal difference between the latter two populations ( $P=0.054$ ) (Table 5).

**Table 4.** Prevalence of *SH2B1* rare non-synonymous mutations in obese and lean children.

| Variations                      | Obesity (n = 334) | Control (n = 221) |
|---------------------------------|-------------------|-------------------|
| G131S                           | 0                 | 1                 |
| L293R                           | 0                 | 1                 |
| W649G                           | 0                 | 1                 |
| V209I                           | 1                 | 0                 |
| M465T                           | 2                 | 0                 |
| Prevalence of mutation carriers | 0.90%             | 1.36%             |
| <i>P</i> value                  | >0.05             |                   |

doi:10.1371/journal.pone.0067039.t004

**Table 5.** Prevalence of *FTO* and *SH2B1* rare non-synonymous mutations in different populations.

|              | Our cohort     | Meyre's[22]EA_ESP | AA_ESP |      |      |
|--------------|----------------|-------------------|--------|------|------|
| Population   | CHC            | FC/EC             | EA     | AA   |      |
| <i>FTO</i>   | N              | 338               | 680    | 4300 | 2198 |
|              | Rare missense  | 8                 | 9      | 96   | 36   |
|              | Prevalence (%) | 2.37              | 1.32   | 2.23 | 1.64 |
| <i>SH2B1</i> | N              | 334               | —      | 4300 | 2197 |
|              | Rare missense  | 3                 | —      | 77   | 55   |
|              | Prevalence (%) | 0.90              | —      | 1.79 | 2.50 |

ESP: NHLBI Exome Sequencing Project; CHC: Chinese Han children; FC/EC: French children/English children from Meyre's cohort [22]; EA: European American; AA: African American.

doi:10.1371/journal.pone.0067039.t005

### Functional Impacts of *FTO* and *SH2B1* Non-synonymous Mutations

Among *FTO* rare non-synonymous mutations, L91P and S482L were predicted deleterious, and all *SH2B1* non-synonymous mutations but L293R were predicted neutral with the three tool software (Table 6). The functional impacts of non-synonymous mutations of *FTO* and *SH2B1* did not differ between obese and lean children ( $P>0.05$ ).

### Discussion

Recent findings in *Fto*-null mice support the notion that *Fto* itself has an important influence on energy balance. *Fto*-null mice are small, are lean, have an increased metabolic rate, and are hyperphagic, whereas *Fto*<sup>-/-</sup> mice are resistant to diet-induced obesity [27]. In contrary, over-expression in mice resulted in increased energy intake and increased adiposity in a dose-dependent manner [28], in agreement with the *FTO* dose-dependent differences in adiposity seen in humans [29]. Taken together, these data suggest that increased *FTO* expression results

**Table 6.** Functional impacts of *FTO* and *SH2B1* rare non-synonymous mutations.

| Gene         | Variants | PROVEAN     | SIFT      | Polyphen-2        |
|--------------|----------|-------------|-----------|-------------------|
| <i>FTO</i>   | L91P     | Deleterious | Tolerated | Probably damaging |
|              | E129K    | Neutral     | Tolerated | Benign            |
|              | D144N    | Neutral     | Tolerated | Possibly damaging |
|              | Y185C    | Neutral     | Tolerated | Benign            |
|              | H290R    | Neutral     | Tolerated | Benign            |
| <i>SH2B1</i> | D348N    | Neutral     | Tolerated | Benign            |
|              | S482L    | Neutral     | Damaging  | Possibly damaging |
|              | G131S    | Neutral     | Tolerated | Benign            |
|              | L293R    | Deleterious | Damaging  | Probably damaging |
|              | V209I    | Neutral     | Tolerated | Benign            |
|              | M465T    | Neutral     | Tolerated | Benign            |
|              | W649G    | Neutral     | Damaging  | Benign            |

PROVEAN: Protein Variation Effect Analyzer; SIFT: Sorts Intolerant From Tolerant; Polyphen-2: Polymorphism Phenotyping v2.

doi:10.1371/journal.pone.0067039.t006

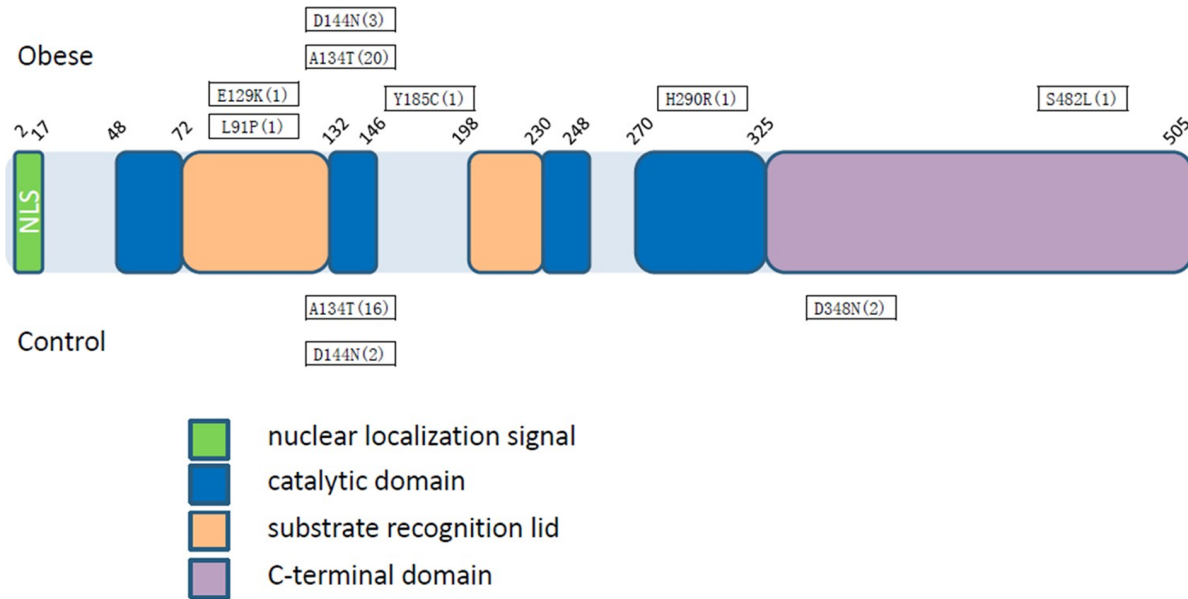

**Figure 1. Distribution of rare non-synonymous variants along *FTO* functional domains.** *FTO* protein is consisted of a N-terminal domain (NTD, residue 32–326) and a C-terminal domain (CTD, residue 327–505). Different non-synonymous mutations with frequency in parenthesis were presented both for obese children and control population.  
doi:10.1371/journal.pone.0067039.g001

in increased food intake, leading to increased adiposity. Thus, a gain-of-function effect is suggested for the pathogenic role of *FTO* in human obesity.

Given that information, it is reasonable to speculate that function-impairing mutations in *FTO* might be more common in lean rather than obese subjects.

However, our results and data from obese children of Caucasians by Meyre, et al [23] and of African Ancestry by Deliard et al [30] clearly demonstrate that the rare non-synonymous mutations are not enriched in lean control.

*FTO* protein is an AlkB-like DNA/RNA demethylase with a strong preference for 3-methylthymidine (3-meT) in single-stranded DNA or 3-methyluracil (3-meU) in single-stranded RNA [30–34]. More recently, Jia et al [35] demonstrated that *FTO* could efficiently demethylate N<sup>6</sup>-methyladenosine (m<sup>6</sup>A) at neutral pH *in vitro* and that the amount of m<sup>6</sup>A in cellular mRNA is affected by the oxidation activity of *FTO in vivo*, concluding that m<sup>6</sup>A acts as the natural substrate for *FTO* in physiological condition. *FTO* is consisted of an amino-terminal AlkB-like domain (NTD) and a carboxyl-terminal domain (CTD) with a novel fold. The interaction between these two domains is required for *FTO* catalytic activity [36]. *FTO* possesses an extra loop (residues 213–224) that it has an important role in *FTO* selection against double-stranded nucleic acids [36]. H231, D233, H307, and residues within the extra loop are highly conserved among *FTO* proteins from different species. Biochemical assay shows that mutations at F114, C392, R96, and E234 abolish or greatly reduce the catalytic activity of *FTO* [36]. Boissel, et al [31] found a consanguineous Israeli-Arab family in which nine siblings were homozygous for the R316Q mutation in *FTO*, which resulted in a diminished catalytic activity. All homozygous carriers were severely growth retarded, had multiple congenital malformations, and died in infancy, and heterozygous parents of these children had no obesity or overweight phenotype. Similarly, R322 is also essential for *FTO* catalytic activity, and heterozygous mutations

that severely impaired enzymatic activity of *FTO* were found in both lean and obese individuals with no other obvious major clinical phenotypes [23]. Furthermore, the R316Q mutation abolished 80% of the wild-type activity toward m<sup>6</sup>A demethylation *in vitro*, while H231A D233A and R316Q R322Q double mutant *FTO* proteins completely lost m<sup>6</sup>A-demethylation activity, suggesting that m<sup>6</sup>A in nuclear RNA is the physiological substrate of *FTO* and that the function of *FTO* likely affects the processing of pre-mRNA, other nuclear RNAs, or both [35]. Two non-synonymous mutations (L91P and S482L), that are solely detected in obese children, are within the so-called substrate recognition lid and CTD of *FTO* protein, respectively (Figure 1.), and predicted to compromise *FTO* catalytic activity. Meyer et al [23] also tested the enzymatic activity of several other variants representing the different regions of *FTO* (P5L, V94I, I148R, M223V, E234D, A241T, A405V, I492V, and V493F), and found none of these variants, all of which are located in less conserved positions, had any significant impact on enzymatic activity. The observed activity of *FTO* is exceedingly low compared to those of the other AlkB-family proteins [37], it's reasonable to speculate that with m<sup>6</sup>A as a substrate, the functional impacts of the mutant *FTO* proteins including L91P and S482L identified in this study could be more accurately assessed.

As heterozygous deletion of *SH2B1* in mice leads to obesity on a high-fat diet [22], Bochukova et al [18] suggested that *SH2B1* gene haploinsufficiency may be a plausible mechanism underlying the phenotype seen in humans. However, Bochukova et al. sequenced the *SH2B1* gene in 500 patients from the Genetics of Obesity Study (GOOS) but did not identify any coding or splice site mutations [18]. Alike to *FTO*, a similar prevalence of rare missense mutations of *SH2B1* is revealed in Chinese obese children and lean control. Among non-synonymous mutations of *SH2B1* detected in this cohort, only one (L293R) is predicted deleterious to protein function by tool software. L293 locates in the pleckstrin homology (PH) domain (residues 249–378) of *SH2B1* protein,

which is thought to mediate binding to inactive JAK2, whereas the SH2 domain (residues 521–625) near the C terminus is critical to binding to active, phosphorylated JAK2 [38]. Though *SH2B1* point mutations may significantly impair the growth hormone (GH)/nerve growth factor (NGF)-mediated signaling in vitro, all mutants except F344LfsX20 did not impair leptin signaling [39]. It's plausible to speculate that loss-of-function mutation of *SH2B1* may not significantly involved in pathogenesis of Chinese children obesity.

In conclusion, rare non-synonymous mutations of *FTO* and *SH2B1* are equally detected in obese and lean Chinese children. The rare missense mutations of *FTO* and *SH2B1* do not confer risks of obesity in Chinese Han children in our cohort. Novel and non-deleterious missense variants detected in *FTO* unique to obese individuals are of significant interest to reveal their potential functional impact on *FTO* protein.

## References

- Guh DP, Zhang W, Bansback N, Amarsi Z, Birmingham CL, et al. (2009) The incidence of co-morbidities related to obesity and overweight: a systematic review and meta-analysis. *BMC Public Health*. 9: 88.
- Bjorge T, Engeland A, Tverdal A, Smith GD. (2008) Body mass index in adolescence in relation to cause-specific mortality: a follow-up of 230,000 Norwegian adolescents. *Am J Epidemiol*. 168: 30–37.
- Franks PW, Hanson RL, Knowler WC, Sievers ML, Bennett PH, et al. (2010) Childhood obesity, other cardiovascular risk factors, and premature death. *N Engl J Med*. 362: 485–493.
- Yoon KH, Lee JH, Kim JW, Cho JH, Choi YH, et al. (2006) Epidemic obesity and type 2 diabetes in Asia. *Lancet*. 368: 1681–1688.
- Chen CM. (2008) Overview of obesity in Mainland China. *Obes Rev*.(Suppl 1): 9 14–21.
- de Onis M, Blossner M, Borghi E. (2010) Global prevalence and trends of overweight and obesity among preschool children. *Am J Clin Nutr*. 92: 1257–1264.
- Ji CY. (2008) The prevalence of childhood overweight/obesity and the epidemic changes in 1985–2000 for Chinese school-age children and adolescents. *Obes Rev*. 9 (Suppl 1): 78–81.
- Loos RJ, Bouchard C. (2003) Obesity—is it a genetic disorder? *J Intern Med*. 254: 401–425.
- Wardle J, Carnell S, Haworth CM, Plomin R. (2008) Evidence for a strong genetic influence on childhood adiposity despite the force of the obesogenic environment. *Am J Clin Nutr*. 87: 398–404.
- Frayling TM, Timpson NJ, Weedon MN, Zeggini E, Freathy RM, et al. (2007) A common variant in the *FTO* gene is associated with body mass index and predisposes to childhood and adult obesity. *Science*. 316: 889–894.
- Dina C, Meyre D, Gallina S, Durand E, Körner A, et al. (2007) Variation in *FTO* contributes to childhood obesity and severe adult obesity. *Nat Genet*. 39: 724–726.
- Hinney A, Nguyen TT, Scherag A, Friedel S, Brönnner G, et al. (2007) Genome wide association (GWA) study for early onset extreme obesity supports the role of fat mass and obesity associated gene (*FTO*) variants. *PLoS ONE* 2: e1361.
- Scuteri A, Sanna S, Chen WM, Uda M, Albai G, et al. (2007) Genome-wide association scan shows genetic variants in the *FTO* gene are associated with obesity-related traits. *PLoS Genet* 3: e115.
- Willer CJ, Speliotes EK, Loos RJ, Li S, Lindgren CM, et al. (2009) Six new loci associated with body mass index highlight a neuronal influence on body weight regulation. *Nat Genet*. 41: 25–34.
- Thorleifsson G, Walters GB, Gudbjartsson DF, Steinthorsdottir V, Sulem P, et al. (2009) Genome-wide association yields new sequence variants at seven loci that associate with measures of obesity. *Nat Genet*. 41: 18–24.
- Renström F, Payne F, Nordström A, Brito EC, Rolandsson O, et al. (2009) Replication and extension of genome-wide association study results for obesity in 4923 adults from northern Sweden. *Hum Mol Genet*. 18: 1489–1496.
- Bauer F, Elbers CC, Adan RA, Loos RJ, Onland-Moret NC, et al. (2009) Obesity genes identified in genome-wide association studies are associated with adiposity measures and potentially with nutrient-specific food preference. *Am J Clin Nutr*. 90: 951–959.
- Bochukova EG, Huang N, Keogh J, Henning E, Purmann C, et al. (2010) Large, rare chromosomal deletions associated with severe early-onset obesity. *Nature*. 463: 666–670.
- Walters RG, Jacquemont S, Valsesia A, de Smith AJ, Martinet D, et al. (2010) A new highly penetrant form of obesity due to deletions on chromosome 16p11.2. *Nature*. 463: 671–675.
- Duan C, Yang H, White MF, Rui L. (2004) Disruption of the SH2-B gene causes age-dependent insulin resistance and glucose intolerance. *Mol Cell Biol*. 24: 7435–7443.

## Supporting Information

**Table S1** PCR primers for amplification of *FTO* coding regions. (DOCX)

**Table S2** PCR primers for amplification of *SH2B1* coding regions. (DOCX)

## Acknowledgments

We thank the support from the patient and the family.

## Author Contributions

Conceived and designed the experiments: YGY. Performed the experiments: ZJZ REY JG. Analyzed the data: ZJZ QHF YPS YGY. Contributed reagents/materials/analysis tools: LH XDH PRY JL YD YNS. Wrote the paper: ZJZ YPS YGY.

- Ren D, Li M, Duan C, Rui L. (2005) Identification of SH2-B as a key regulator of leptin sensitivity, energy balance, and body weight in mice. *Cell Metab*. 2: 95–104.
- Ren D, Zhou Y, Morris D, Li M, Li Z, et al. (2007) Neuronal SH2B1 is essential for controlling energy and glucose homeostasis. *J Clin Invest*. 117: 397–406.
- Meyre D, Proulx K, Kawagoe-Takaki H, Vatn V, Gutiérrez-Aguilar R, et al. (2010) Prevalence of loss-of-function *FTO* mutations in lean and obese individuals. *Diabetes*. 59: 311–318.
- Sällman Almén M, Rask-Andersen M, Jacobsson JA, Ameer A, Kalnina I, et al. (2012) Determination of the obesity-associated gene variants within the entire *FTO* gene by ultra-deep targeted sequencing in obese and lean children. *Int J Obes*. doi: 10.1038/ijo.2012.57. [Epub ahead of print]
- J Wang, H Mei, W Chen, Y Jiang, W Sun, et al. (2011) Study of eight GWAS-identified common variants for association with obesity-related indices in Chinese children at puberty. *Int J Obesity*. 2011: 1–6.
- Choi Y, Sims GE, Murphy S, Miller JR, Chan AP (2012) Predicting the Functional Effect of Amino Acid Substitutions and Indels. *PLoS ONE* 7(10): e46688.
- Fischer J, Koch L, Emmerling C, Vierkotten J, Peters T, et al. (2009) Inactivation of the *Fto* gene protects from obesity. *Nature*. 458: 894–898.
- Church C, Moir L, McMurray F, Girard C, Banks GT, et al. (2010) Overexpression of *Fto* leads to increased food intake and results in obesity. *Nat Genet*. 42: 1086–92.
- Frayling TM, Timpson NJ, Weedon MN, Zeggini E, Freathy RM, et al. (2007) A common variant in the *FTO* gene is associated with body mass index and predisposes to childhood and adult obesity. *Science*. 316: 889–94.
- Deliard S, Panossian S, Mentch FD, Kim CE, Hou C, et al. (2013) The Missense Variation Landscape of *FTO*, *MC4R*, and *TMEM18* in Obese Children of African Ancestry. *Obesity (Silver Spring)*. 21: 159–163.
- Boissel S, Reish O, Proulx K, Kawagoe-Takaki H, Sedgwick B, et al. (2009) Loss-of-function mutation in the diacylglycerol 4-phosphatase *Fto* causes severe growth retardation and multiple malformations. *Am J Hum Genet*. 85: 106–111.
- Gerken T, Girard CA, Tung YC, Webby CJ, Saudek V, et al. (2007) The obesity-associated *FTO* gene encodes a 2-oxoglutarate-dependent nucleic acid demethylase. *Science*. 318: 1469–1472.
- Sanchez-Pulido L, Andrade-Navarro MA. (2007) The *FTO* (fat mass and obesity associated) gene codes for a novel member of the non-heme diacylglycerol 4-phosphatase superfamily. *BMC Biochem*. 8: 23–28.
- Jia G, Yang CG, Yang S, Jian X, Yi C, et al. (2008) Oxidative demethylation of 3-methylthymine and 3-methyluracil in single-stranded DNA and RNA by mouse and human *Fto*. *FEBS Lett*. 582: 3313–3319.
- Jia G, Fu Y, Zhao X, Dai Q, Zheng G, et al. (2011) N6-methyladenosine in nuclear RNA is a major substrate of the obesity-associated *Fto*. *Nat Chem Biol*. 7: 885–887.
- Han Z, Niu T, Chang J, Lei X, Zhao M, et al. (2010) Crystal structure of the *Fto* protein reveals basis for its substrate specificity. *Nature*. 464: 1205–9.
- Lee DH, Jin SG, Cai S, Chen Y, Pfeifer GP, et al. (2005) Repair of methylation damage in DNA and RNA by mammalian AlkB homologues. *J Biol Chem*. 280: 39448–39459.
- Li Z, Zhou Y, Carter-Su C, Myers Jr MG, Rui L. (2007) SH2B1 enhances leptin signaling by both Janus kinase 2 Tyr813 phosphorylation-dependent and -independent mechanisms. *Mol Endocrinol* 21: 2270–2281.
- Doche ME, Bochukova EG, Su HW, Pearce LR, Keogh JM, et al. (2012) Human SH2B1 mutations are associated with maladaptive behaviors and obesity. *J Clin Invest*. 122: 4732–4736.
